# Supplementary material for: Microfluidic confined acoustic streaming vortex for liposome synthesis
Source: Royal Society of Chemistry journal article supplement (doi:10.1039/d4lc00184b), 2024-01-01
Supplement: d4lc00184b1.pdf [file d4lc00184b1.pdf]

## Supplementary Information to **Microfluidic Confined Acoustic Streaming Vortex for Liposome Synthesis**

Huihui Xu, Zhaoxun Wang, Wei Wei, Tiechuan Li, and Xuexin Duan

State Key Laboratory of Precision Measuring Technology & Instruments, and College of Precision Instrument and Opto-electronics Engineering, Tianjin University, Tianjin 300072, China.

E-mail: [xduan@tju.edu.cn](mailto:xduan@tju.edu.cn)

### 1. Experimental setup photography

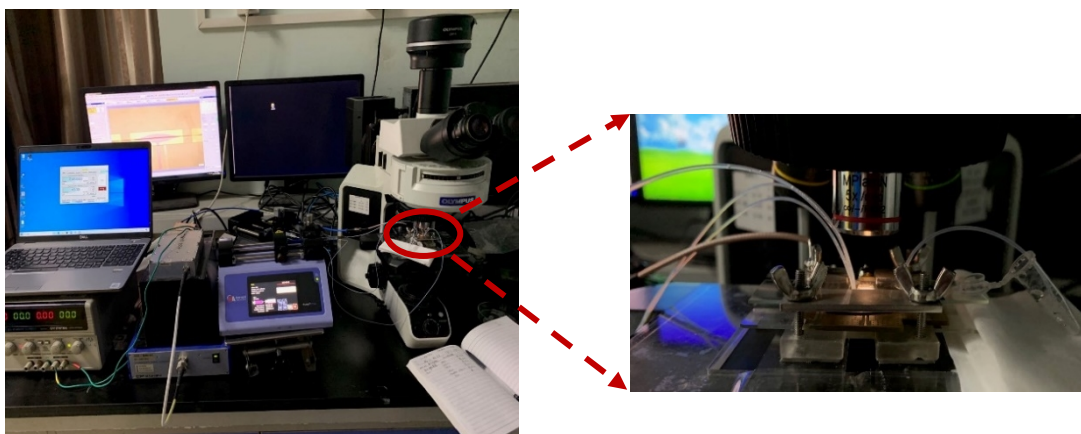

**Figure S1.** Photography of symmetrical fusiform-like-shaped solid mount resonator (SFLS-SMR) based liposome synthesis platform. The whole platform is mainly composed of signal source, power amplifier, resonator, syringe pumps and microscope observation systems.

### 2. Liposome synthesis based on pentagonal resonator

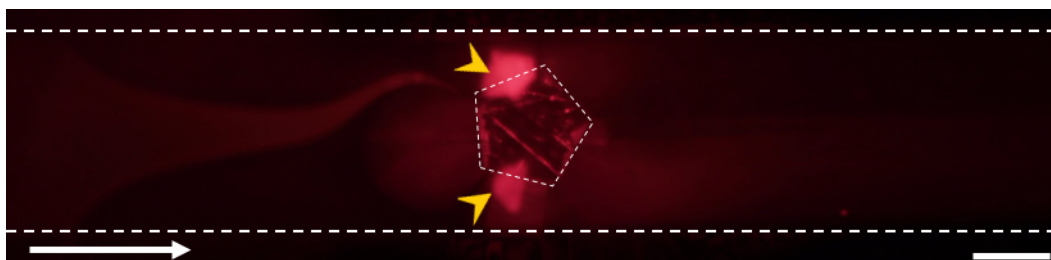

**Figure S2.** Experimental results with inflow perpendicular to one side of the pentagonal resonator. Fluorescent phospholipids were added into the lipid precursor solution for visualization. The red fluorescence is the aggregation of lipid mixture. The white arrowed line represents the direction of liquid flow. The white dashed line represents the boundary of the microchannel. The orange arrows mark lipid aggregates. Scale bar, 200  $\mu\text{m}$ .

### 3. Acoustic streaming performance in microchannels of different heights

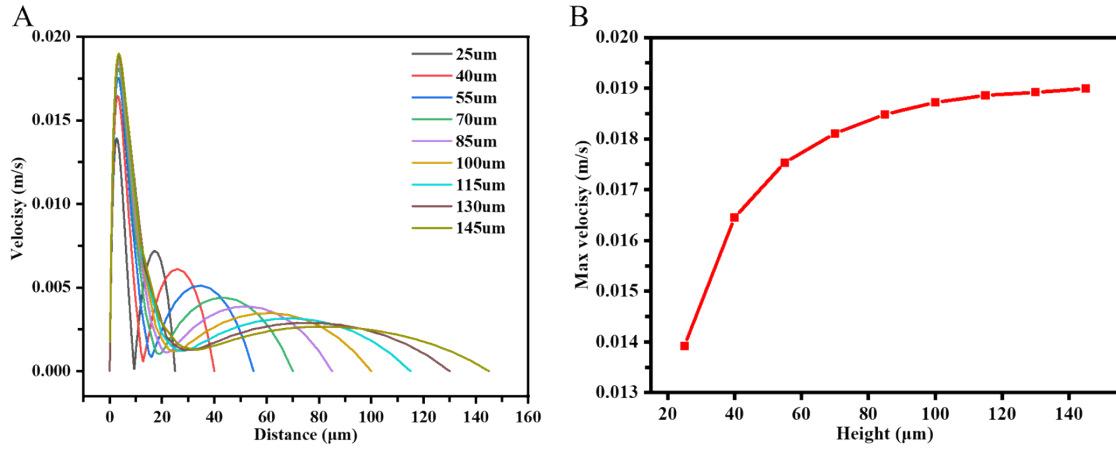

**Figure S3.** (A) Numerical calculation results of the acoustic streaming velocity distribution along the z-axis at the edge of the device at the cross-section of  $x=0$ . (B) The statistics of the maximum velocity in Figure A.

#### 4. Length analysis results of ASHFF and mixing zones

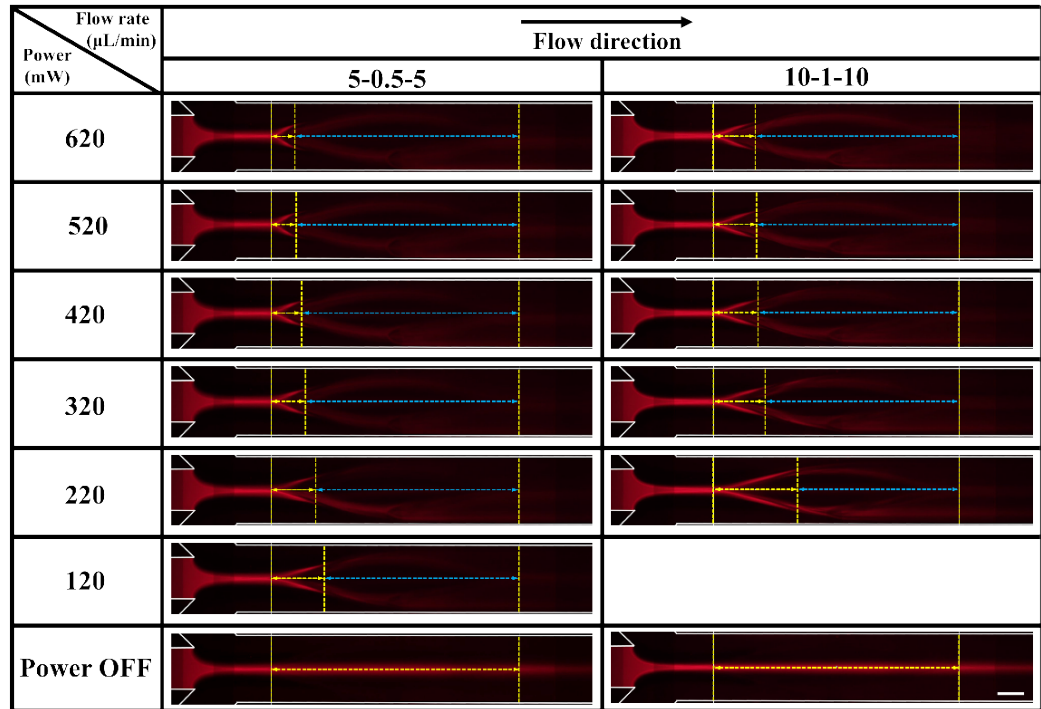

**Figure S4.** The length distribution of ASHFF zone and mixing zone when the total flow rate of 10.5  $\mu\text{L}/\text{min}$  and 21  $\mu\text{L}/\text{min}$ . The yellow dot lines with double arrows represent the pre-mixing zone, and the blue ones represent the mixing zone. Scale bar, 200  $\mu\text{m}$ .

#### 5. The fabrication process of SMR

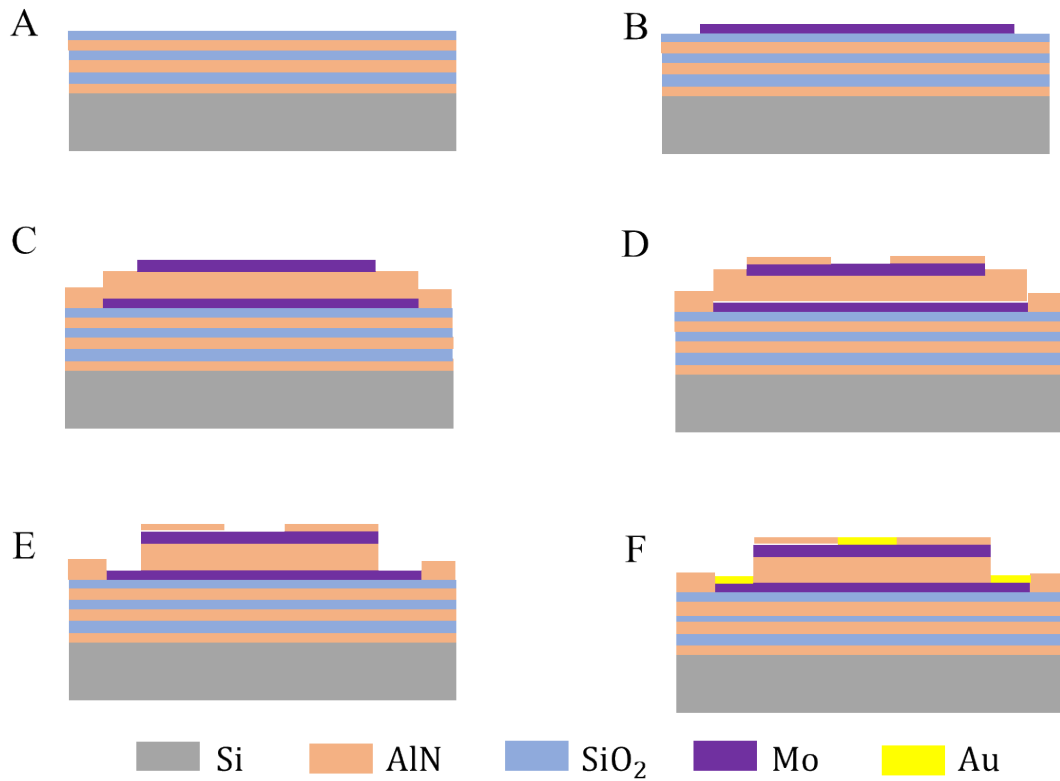

**Figure S5.** (A) AlN and SiO<sub>2</sub> are alternately deposited in three layers by magnetron sputtering and chemical vapor deposition, respectively. The first layer is 1200 nm and 700 nm, the second layer is 1000 nm and 1300 nm, and the third layer is 1000 nm and 650 nm. (B) Deposition of the bottom electrode Mo (170 nm) followed by patterning using the dry etching method. (C) Deposition of piezoelectric thin film AlN (1100 nm) and top electrode Mo (150 nm), followed by patterning of the top electrode. (D) Deposit AlN (200 nm) as passivation layer to protect the top electrode Mo from oxidation and corrosion. Etch the passivation layer at the end of the pad of the top electrode to expose the segment intended for power connection. (E) Etch the passivation layer and the piezoelectric film AlN to expose the bottom electrode. (F) Deposition Au (200 nm) at the exposed pads using physical vapor deposition (PVD). Subsequently, excess Au on other segments was removed using the lift-off process.
